# Supplementary material for: A novel electrochemical sensor based on a P 2 W 15 V 3 @CNTs composite for the sensitive determination of baicalin
Source: Royal Society of Chemistry journal article supplement (doi:10.1039/d5nj04437e), 2026-01-01
Supplement: d5nj04437e1.pdf [file d5nj04437e1.pdf]

## Supporting information

### **A novel electrochemical sensor based on $P_2W_{15}V_3@CNTs$ composite for the sensitive determination of baicalin**

Miao Miao,<sup>a</sup> Xue-Rui Dong,<sup>a</sup> Zhe Lin,<sup>a</sup> Qiao Gao,<sup>\*a</sup>

<sup>a</sup>School of Pharmaceutical Sciences, Changchun University of Chinese Medicine, Changchun, 130117, PR China

\*Corresponding Authors: gaoq915@nenu.edu.cn

#### **1.1 Materials and Reagents**

All chemicals and reagents were commercially obtained and used without further purification. Carbon nanotubes (CNTs,  $\geq 99\%$  purity) with inner diameter 5-8 nm, outer diameter 10-15 nm, length 2-8  $\mu\text{m}$ , and resistivity 1700  $\mu\Omega\cdot\text{m}$  were purchased from Aladdin Reagent Co., Ltd. (Shanghai, China). Methyl parathion (99.8% purity) was purchased from TMRM Quality Inspection Technology Co., Ltd. Baicalin (99.8% purity) was purchased from Yuanye Bio-Technology Co. Ltd. Nafion (5 wt%) was offered by Sigma-Aldrich (Shanghai, China). The following chemicals were procured from aladdin Biochemical Technology Co., Ltd. (Shanghai, China): Zinc chloride ( $\text{ZnCl}_2$ ,  $\geq 98.0\%$ ), potassium chloride ( $\text{KCl}$ ,  $\geq 99\%$ ), ferric chloride ( $\text{FeCl}_3$ ,  $\geq 99.0\%$ ), glucose ( $\geq 99.8\%$ ), citric acid ( $\geq 99.5\%$ ), ascorbic acid ( $\geq 99.7\%$ ), urea ( $\geq 99.0\%$ ), potassium ferrocyanide trihydrate ( $\text{K}_4[\text{Fe}(\text{CN})_6]$ ,  $\geq 99.5\%$ ), potassium ferricyanide ( $\text{K}_3[\text{Fe}(\text{CN})_6]$ , 99.5%). Phosphate buffer solution (PBS, pH = 7.0) was prepared using  $\text{NaH}_2\text{PO}_4\cdot 2\text{H}_2\text{O}$  and  $\text{Na}_2\text{HPO}_4\cdot 2\text{H}_2\text{O}$ . The pH value of PBS was adjusted with 0.1 mol/L  $\text{H}_3\text{PO}_4$  and 0.1 mol/L NaOH solution. Ultrapure water was used for the preparation of all solutions.

#### **1.2 Physical measurements**

Infrared (IR) spectra were acquired with an Nicolet iS50 FT/IR spectrometer employing KBr pellets in the region of 400-4000 $\text{cm}^{-1}$ . X-ray diffraction (XRD)

patterns were collected on a Rigaku Dmax 2000 X-ray diffractometer, using Cu-K $\alpha$  radiation ( $\lambda = 1.54$  nm) and  $2\theta$  ranging from 5 to 90°. X-ray photoelectron spectra (XPS) were collected with a ESCALAB 250Xi microscope (Thermo, USA). The samples' morphology was examined using transmission electron microscopy (TEM, Tecnai F20, USA). The energy dispersive spectroscopy (EDS) was analysed on a field emission scanning electron microscope (Bruker XFlash 6T-30). The Raman spectra were recorded on a microscopic Raman spectrometer (Horiba HR Evolution, France) with a 633 nm laser source.

### **1.3 Electrochemical methods**

Electrochemical experiments were performed on a CHI-660E electrochemical workstation (Chenhua Instrument, Shanghai, China) equipped with a standard three-electrode system consist of a bare glassy carbon electrode (GCE) or modified GCE as the working electrode, a platinum wire as the counter electrode, and a saturated calomel electrode as the reference electrode. CV curves of desired Bn concentration were recorded in 0.1 mol·L<sup>-1</sup> phosphate-buffered solution (PBS, pH 7.0) over a potential range from -0.3 to 0.6 V, with a scan rate of 100 mV·s<sup>-1</sup>. EIS measurements were carried out in a 5 mM [Fe(CN)<sub>6</sub>]<sup>3-/4-</sup> solution with 0.1 M KCl as the supporting electrolyte, under the following parameters: frequency range of 10 Hz to 1000 kHz, AC amplitude of 5.0 mV, and a constant overpotential of 150 mV. Electrochemical detection of Bn was achieved using adsorptive stripping voltammetry, which included two sequential steps: (I) Enrichment step: The working electrode was immersed in 5 mL of Bn solution in 0.1 mol L<sup>-1</sup> PBS (pH 7.0) and maintained at +0.15 V for 480s at room temperature to facilitate static adsorption of Bn. (II) Detection step: DPV measurements were conducted within a potential range of -0.2 to 0.4 V using optimized parameters: pulse amplitude = 0.05 V, pulse width = 0.05 s, pulse period = 0.5 s, and quiet time = 2 s.

### **1.4 Real sample pretreatment**

Add 1.0257 g of *Scutellaria baicalensis* to 50 mL of ethanol-water (3:7, v/v) mixed solvent, reflux extract at 80°C for 3 hours, filter, and collect the filtrate for later

use. Detection was performed using the standard addition method: 20  $\mu\text{L}$  of the sample filtrate was added to PBS buffer (pH 7.0), followed by the addition of Bn standard solutions (0, 2.6, 4.5, and 6.8  $\mu\text{M}$ ), and the volume was adjusted to 10 mL. Immerse the  $\text{P}_2\text{W}_{15}\text{V}_3@\text{CNTs}/\text{GCE}$  electrode in the solution for 8 minutes to enrich it, then measure using DPV, with three parallel measurements for each concentration.
